# Supplementary material
Source: publisher site journal article supplement (https://www.spandidos-publications.com/3235/downloadSupplementary)
Supplement: Supplementary file 1 [file downloadSupplementary]

Figure S1. Expression analysis of EMT-associated markers in non-small cell lung cancer cell lines (NCI-H358, A549 and NCI-H1703) by qPCR. mRNA expression levels of five EMT-associated markers in NCI-H358, A549 and NCI-H1703 cells. Data are presented as the mean  $\pm$  SD (n=3). The non-parametric Kruskal-Wallis test revealed that mRNA expression levels of the five EMT markers were significantly different among NCI-H358, A549 and NCI-H1703 cells ( $P < 0.05$ ). However, no significantly different mRNA expression levels were observed in the pairwise comparisons between the cells ( $P > 0.0167$ ). ns, not significant. qPCR, quantitative PCR; EMT, epithelial-mesenchymal transition; hnRNPA2/B1, heterogeneous nuclear ribonucleo-protein A2/B1; ZEB1, zinc finger E-box-binding homeobox 1; HDM2, human double minute 2 protein.

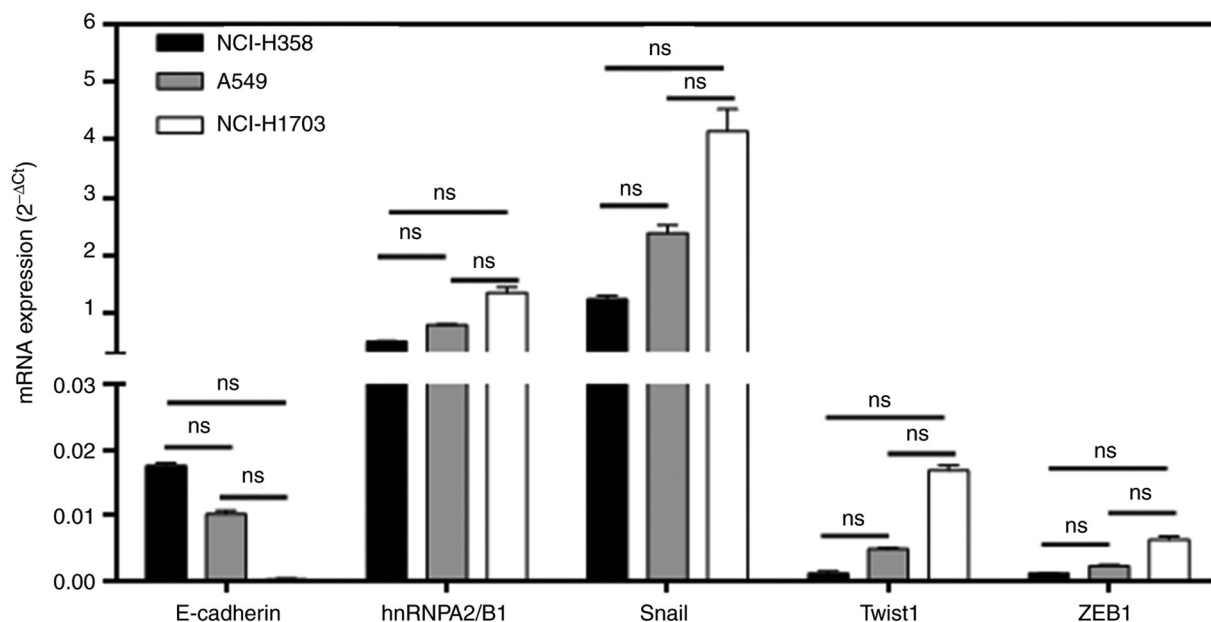

Figure S2. hnRNP A2/B1 knockdown does not induce apoptosis in A549 cells. (A) Apoptosis assays of siCon- or siA2B1-transfected A549 cells. Transfected cells were analyzed by Annexin V/PI staining. (B) Statistical analysis of A. ns, not significant. siCon, control small interfering RNA; hnRNP A2/B1, heterogeneous nuclear ribonucleoprotein A2/B1; siA2B1, small interfering RNA targeting hnRNP A2/B1; PI, propidium iodide.

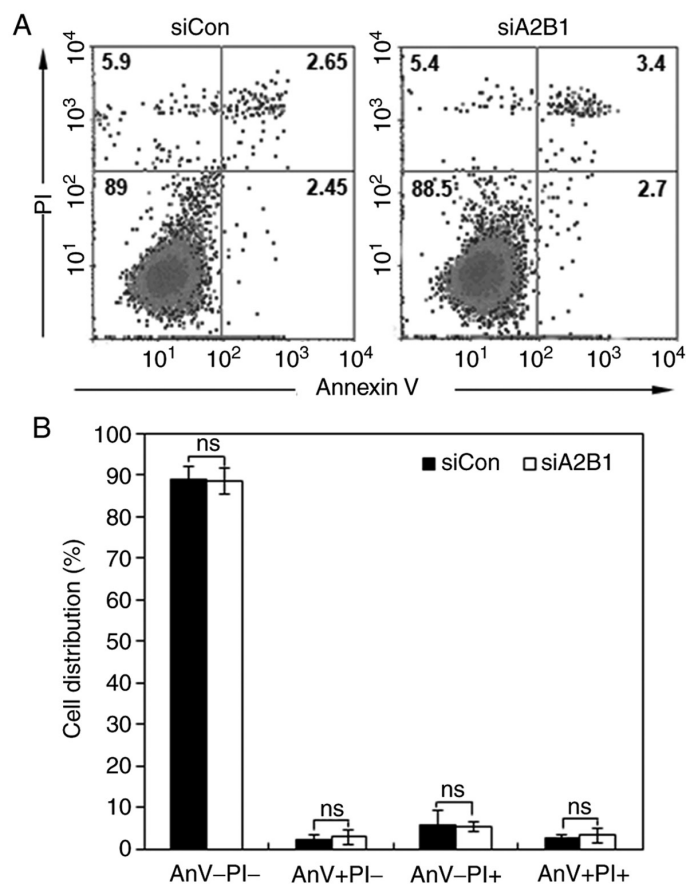

Figure S3. hnRNPA2/B1 knockdown decreases the protein expression levels of vimentin and increases the levels of E-cadherin. siCon- or siA2B1-transfected A549 cells were analyzed by western blotting with the indicated antibodies. siCon, control small interfering RNA; hnRNPA2/B1, heterogeneous nuclear ribonucleoprotein A2/B1; siA2B1, small interfering RNA targeting hnRNPA2B1.

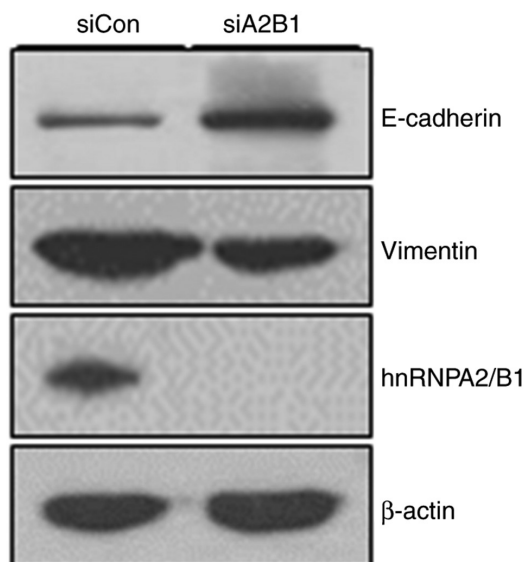

Figure S4. Knockdown of hnRNPA2/B1 in A549 cells with siRNAs. Cells were transfected with siCon or siA2B1 #1, #2 and #3. Knockdown efficiency was determined by western blot analysis. siCon, control small interfering RNA; hnRNPA2/B1, heterogeneous nuclear ribonucleoprotein A2/B1; siA2B1, small interfering RNA targeting hnRNPA2B1.

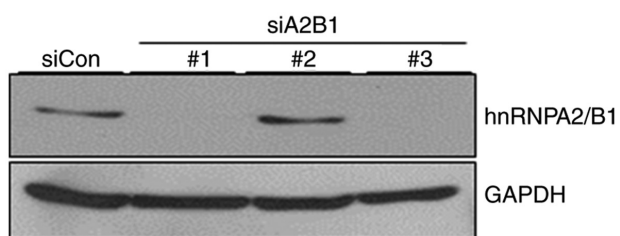

Figure S5. hnRNPA2/B1 promotes the ERK and HDM2 pathway in NCI-H460 cells. The protein expression levels of ERK1, p-ERK1/2, HDM2 and p-HDM2 were determined in siCon- or siA2B1-transfected NCI-H460 cells by western blot analysis. The signal intensities of the blots were analyzed quantitatively, and GAPDH was used as the loading control. siCon, control small interfering RNA; hnRNPA2/B1, heterogeneous nuclear ribonucleoprotein A2/B1; siA2B1, small interfering RNA targeting hnRNPA2B1; p-, phosphorylated; HDM2, double minute 2 protein.

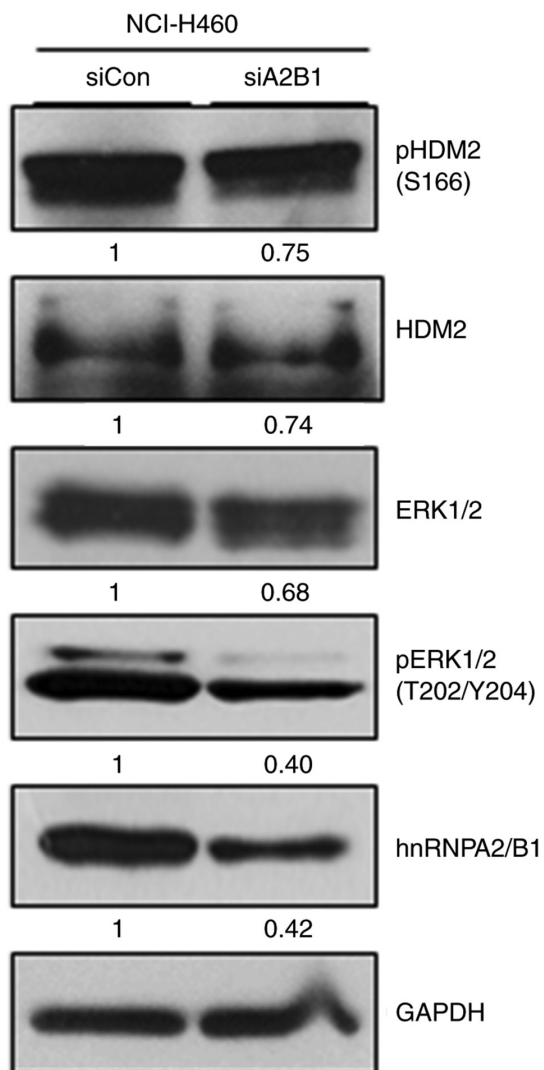

Figure S6. hnRNPA2/B1 expression does not affect the mRNA levels of HDM2. A549 cells were transfected with siCon or siA2B1. Relative mRNA expression levels of HDM2 were determined by quantitative PCR. \* $P < 0.05$  vs. siCon; ns, not significant. siCon, control small interfering RNA; hnRNPA2/B1, heterogeneous nuclear ribonucleoprotein A2/B1; siA2B1, small interfering RNA targeting hnRNPA2B1; HDM2, human double minute 2 protein.

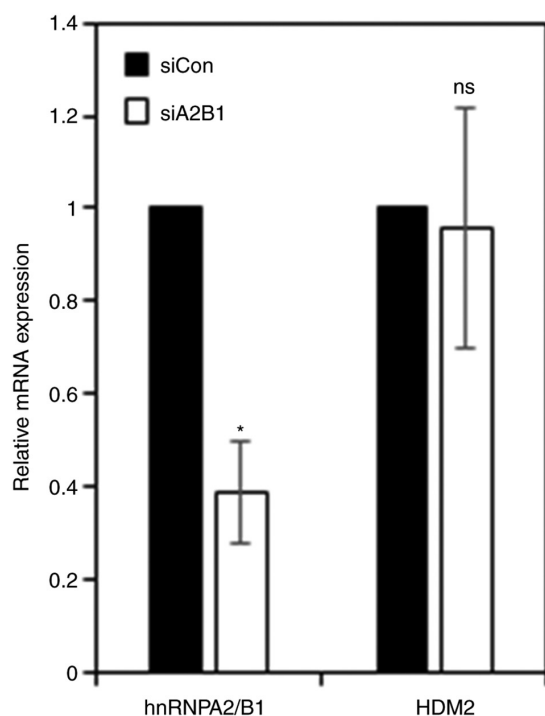

Table SI. Primer sequences used for quantitative PCR.

| Gene       | Sequences (5'-3')                                           | Size, bp |
|------------|-------------------------------------------------------------|----------|
| E-cadherin | F: GAGTGACTTGTTCTGAGTAAGTGT<br>R: TCATAGTTCCGCTCTGTCCTTG    | 123      |
| Snail      | F: GAGCCCAGGCAGCTATTT<br>R: AGTGACAGCCATTACTCACAG           | 102      |
| ZEB1       | F: CTCACATTCCCTCACTGCCTAAC<br>R: GAGAACATAGCTGAGCTCCATAAA   | 106      |
| Twist      | F: TCAAGAGGTCGTGCCAATC<br>R: CGGCCAGTTTGATCCCAGTAT          | 130      |
| hnRNPA2/B1 | F: GACTGTGTGGTAATGAGGGATCCT<br>R: GCTCAACTACTCTCCCATCAATTGA | 133      |
| HDM2       | F: TGTAAGTGAACATTCAGGTG<br>R: TTCCAATAGTCAGCTAAGGA          | 230      |
| GAPDH      | F: ACAGCGACACCCACTCCTCC<br>R: GAGGTCCACCACCCTGTTGC          | 122      |

ZEB1, zinc finger E-box-binding homeobox 1; hnRNPA2/B1, heterogeneous nuclear ribonucleoprotein A2/B1; HDM2, human double minute 2 protein; F, forward; R, reverse.
